# Supplementary material for: Efficient Degradation of 4-Acetamidoantipyrin Using a Thermally Activated Persulfate System
Source: MDPI journal article supplement (doi:10.3390/su142114300), 2022-11-01
Supplement: s1 [file s1]

**Supplementary Data for**  
**Efficient degradation of 4-acetamidoantipyrin by thermally**  
**activated persulfate system**

Qinghong Wang <sup>a</sup>, Siyu Li <sup>a</sup>, Xin Wang <sup>a</sup>, Zhuoyu Li <sup>a \*</sup>, Yali Zhan <sup>a</sup>, Chunmao Chen <sup>a</sup>,

<sup>a</sup> State Key Laboratory of Heavy Oil Processing, State Key Laboratory of Petroleum  
Pollution Control, Beijing Key Laboratory of Oil and Gas Pollution Control, China  
University of Petroleum-Beijing, Beijing 102249, P. R. China

\*Corresponding author:

\* Zhuoyu Li

Phone: +86-10-8973-5022

E-mail: Lizyhit@163.com, lizhuoyu@cup.edu.cn

Numbers of pages: 10

Numbers of texts: 1

Numbers of figures: 6

## List of Supplementary Data

**Text S1.** Separation conditions and operating parameters for UPLC-Orbitrap-MS

**Figure S1.** Schematic of experimental reactors.

**Figure S2.** Pseudo first order reaction kinetic fitting results for 4-AAA degradation with different PDS concentrations (a), initial pH (b) and temperature (c) in thermally activated PDS systems.

**Figure S3.** Calculation of  $E_a$  of 4-AAA in thermally activated PDS systems.

**Figure S4.** Validation experiments of the optimal conditions by RSM model.

**Figure S5.** Chromatography and mass spectrometry of reaction products and structural formula.

**Figure S6.** TOC changes in degradation of 4-AAA by thermal/PS system.

**Text S1** Separation conditions and operating parameters for UPLC-Orbitrap-MS

Separation conditions for UPLC: the mobile phase comprised of water with 0.1% acetic acid (phase A) and methanol with 0.1% acetic acid (phase B) at a flow rate of 0.3 mL/min. The gradient program was: 0 min, 95% A and 5% B; 4 min, 60% A and 40% B; 5 min, 100% B; 6.5-8 min, 95% A and 5% B. Column temperature was 40 °C and the volume of sample was 10 µL.

Operating parameters of MS: mass spectra scan range 100-600 Da, capillary voltage 3500 V, source temperature 110 °C, dissolution temperature 350 °C, cone hole gas flow 50 L/h, desolvent gas flow 800 L/h.

**Figure S1**

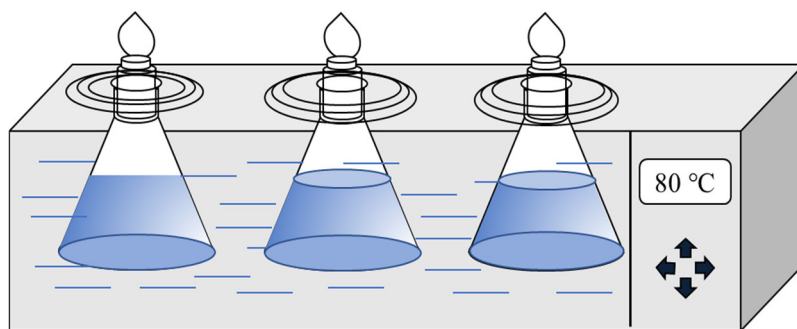

**Figure S1.** Schematic of experimental reactors.

**Figure S2**

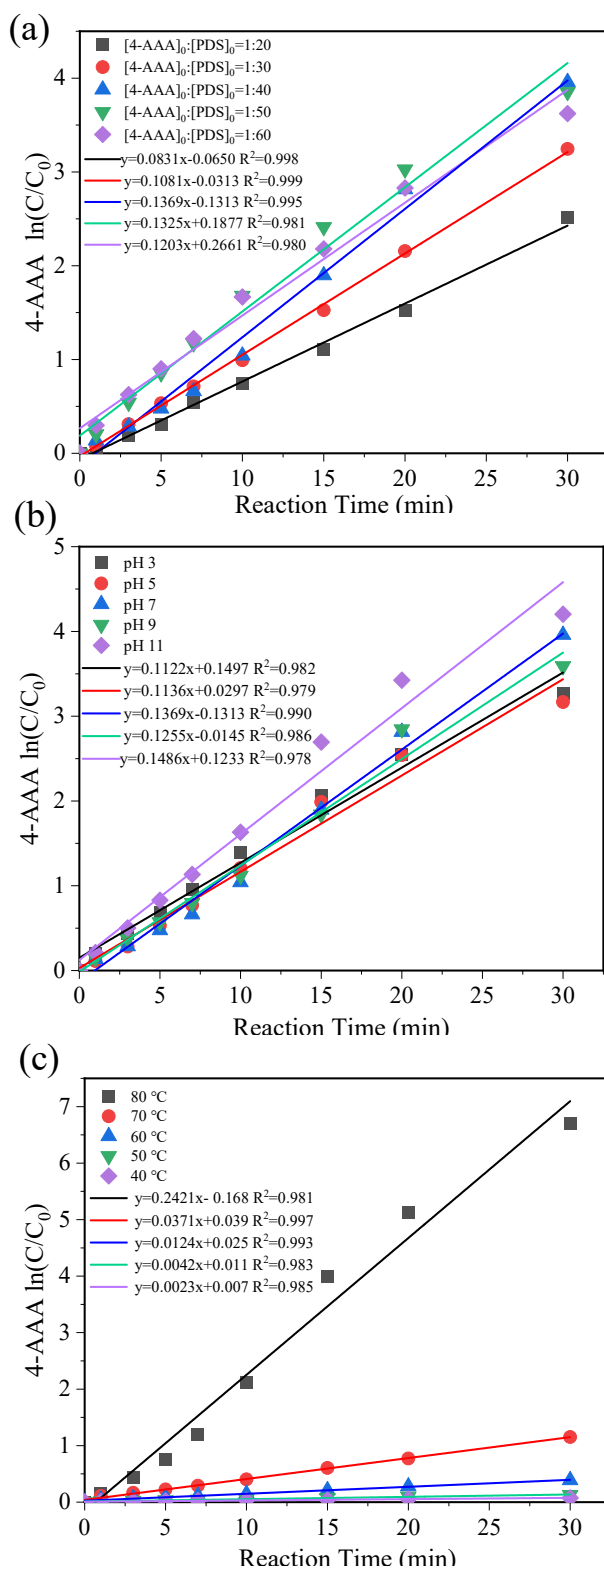

**Figure S2.** Pseudo first order reaction kinetic fitting results for 4-AAA degradation with different PDS concentrations (a), initial pH (b) and temperature (c) in thermally activated PDS systems. Experimental conditions:  $[4\text{-AAA}]_0 = 40.77 \mu\text{M}$ ,  $[\text{PDS}]_0 = 1.63 \text{ mM}$ ,  $\text{pH}_0 = 7$ ,  $T = 80 \text{ }^\circ\text{C}$ .

**Figure S3**

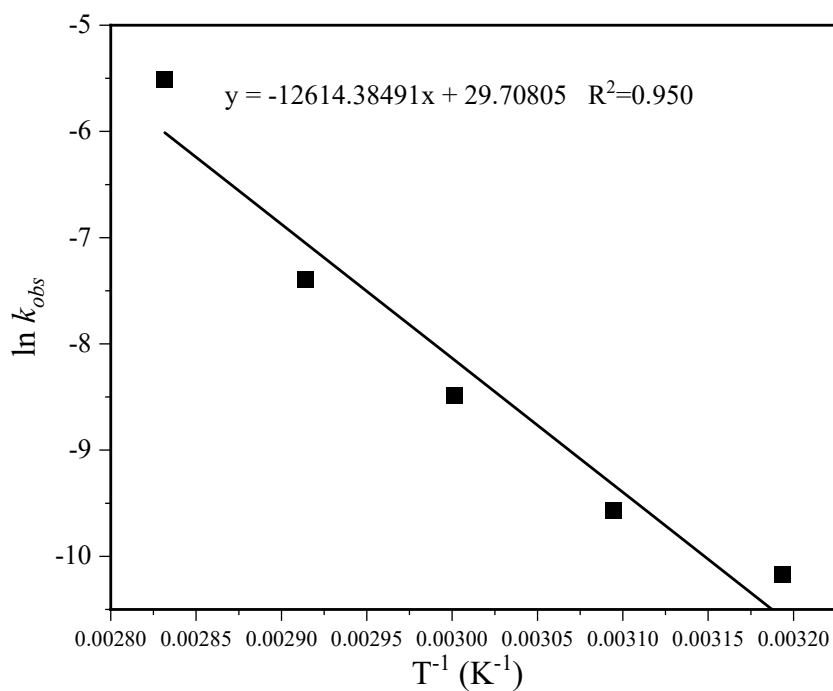

**Figure S3.** Calculation of  $E_a$  of 4-AAA in thermally activated PDS systems. Experimental conditions:  $[4\text{-AAA}]_0 = 40.77 \mu\text{M}$ ,  $[\text{PDS}]_0 = 1.63 \text{ mM}$ ,  $\text{pH}_0 = 7$ .

Notes: Based on Arrhenius equation  $\ln k = -\frac{E}{RT} + \ln A$ , the slope of plot  $\ln k$  vs  $T^{-1}$  in Figure S2 (i.e., -12614.38491) equals  $-\frac{E}{R}$ . As the value of  $R$  was  $8.314 \text{ J}/(\text{mol} \cdot \text{K})$ , the value of  $E_a$  was calculated to be  $104.88 \text{ kJ/mol}$ .

**Figure S4**

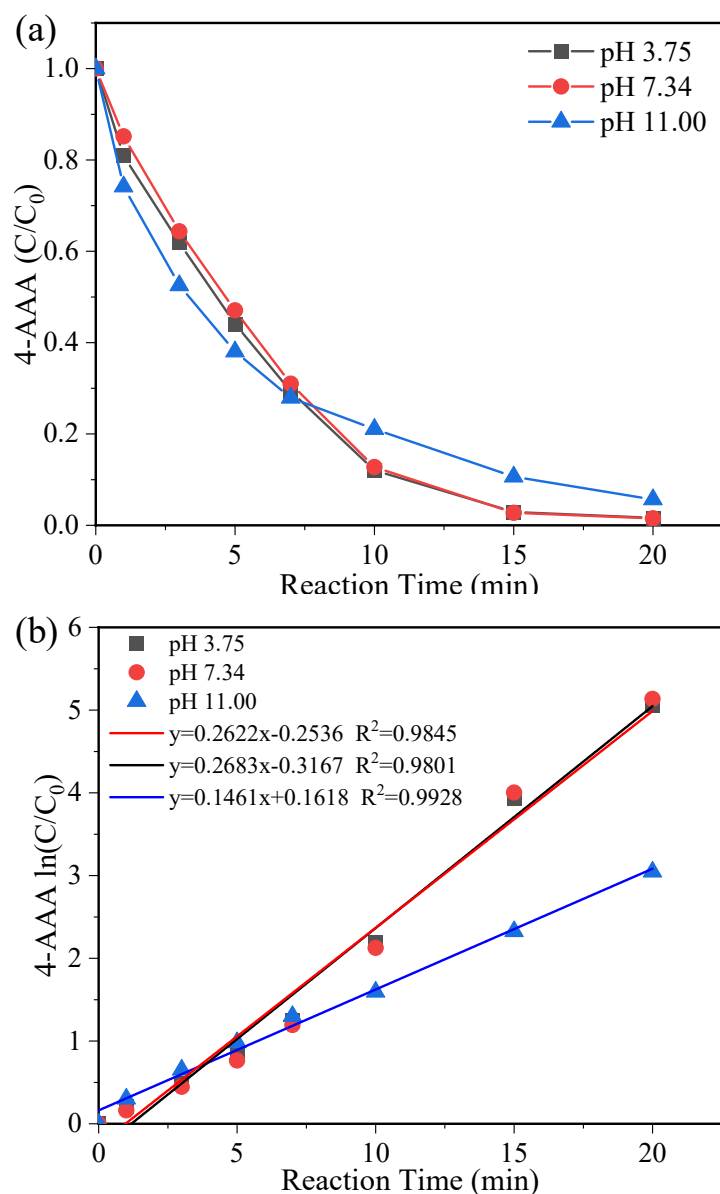

**Figure S4.** Validation experiments of the optimal conditions by RSM model. Experimental conditions:  $[4\text{-AAA}]_0 = 40.77 \mu\text{M}$ ,  $[\text{PDS}]_0 = 2.88 \text{ mM}$ ,  $\text{pH}_0 = 3.75$ ,  $T = 79.24 \text{ }^\circ\text{C}$  (a),  $[4\text{-AAA}]_0 = 40.77 \mu\text{M}$ ,  $[\text{PDS}]_0 = 1.92 \text{ mM}$ ,  $\text{pH}_0 = 7.34$ ,  $T = 79.53 \text{ }^\circ\text{C}$  (b),  $[4\text{-AAA}]_0 = 40.77 \mu\text{M}$ ,  $[\text{PDS}]_0 = 2.36 \text{ mM}$ ,  $\text{pH}_0 = 11.00$ ,  $T = 79.11 \text{ }^\circ\text{C}$  (c).

**Figure S5**

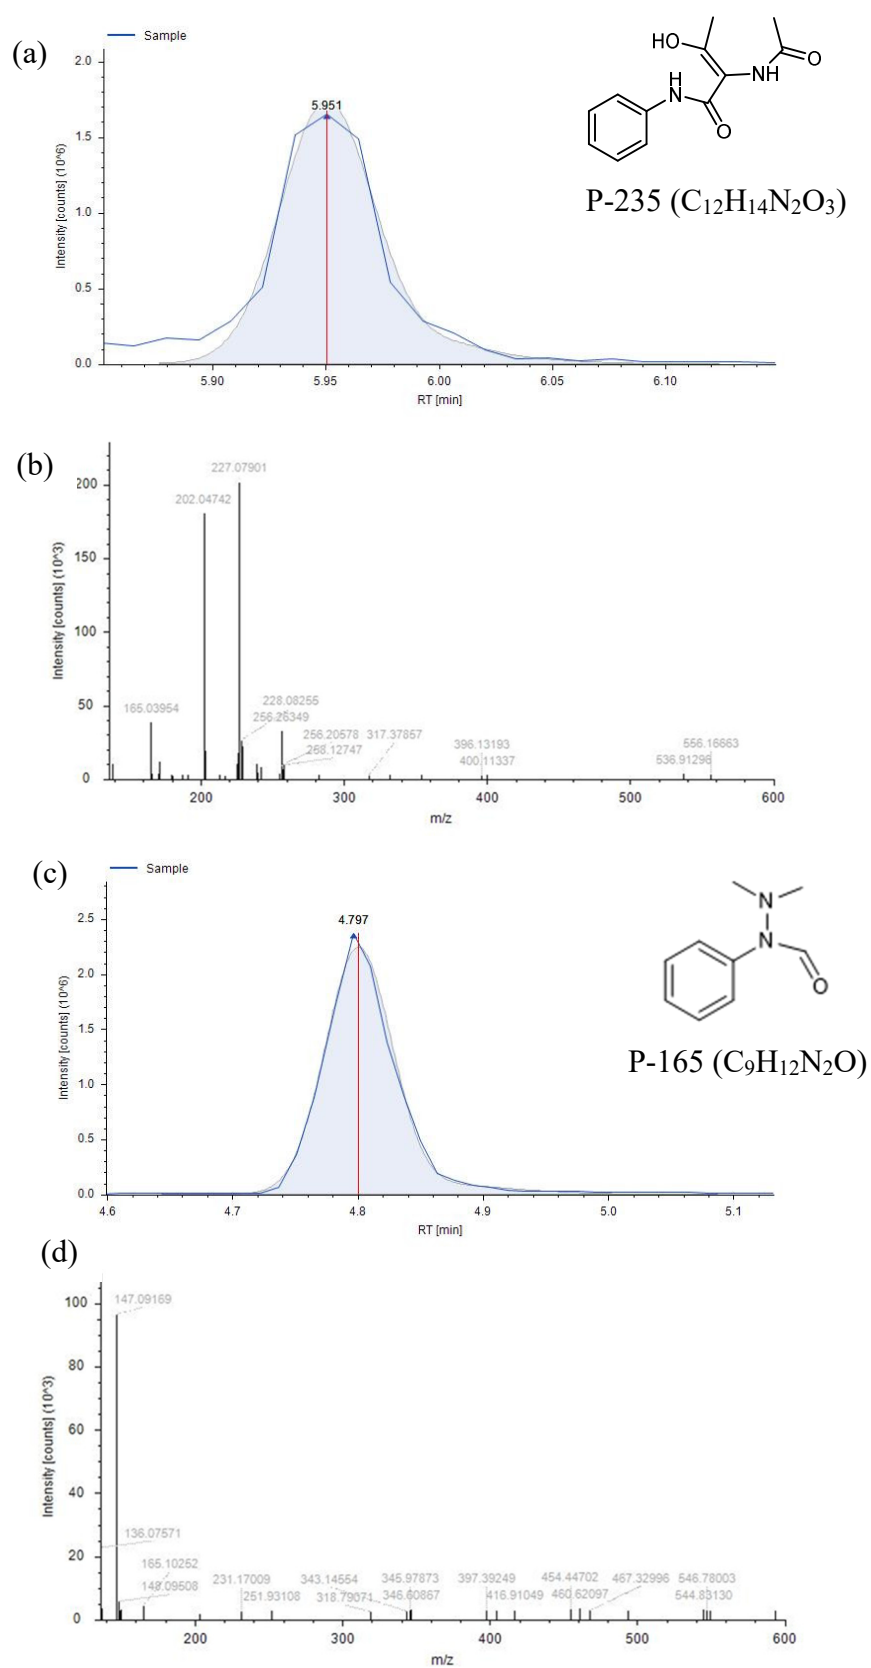



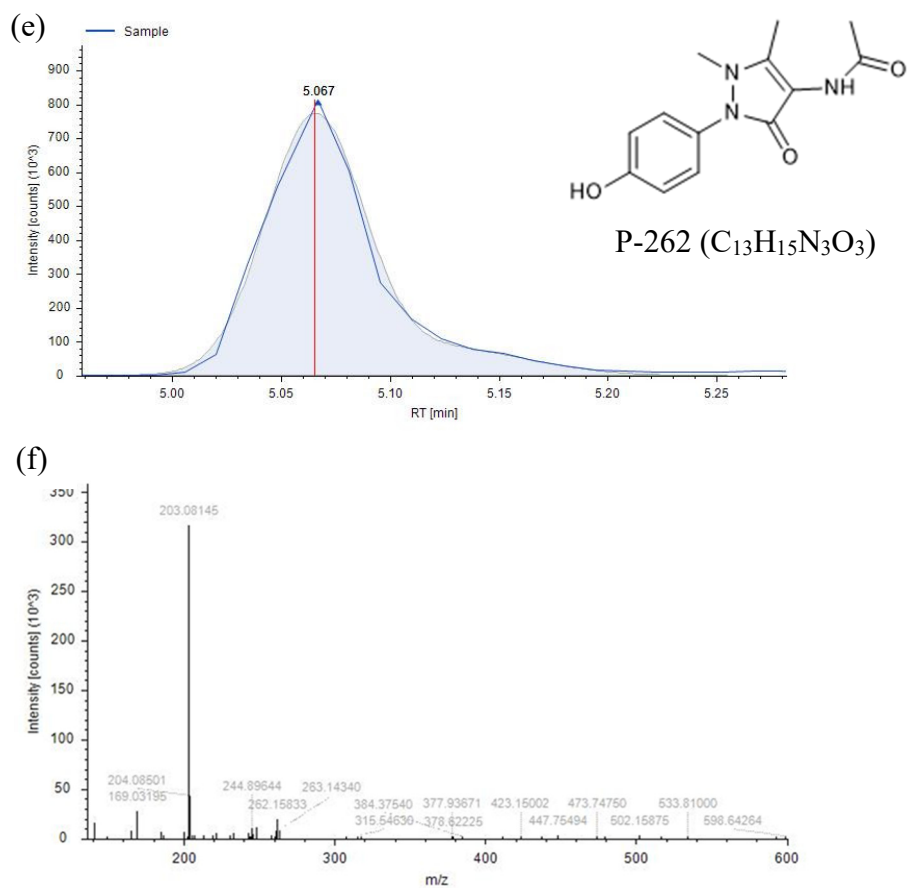

**Figure S5.** Chromatography and mass spectrometry of reaction products and structural formula.

**Figure S6**

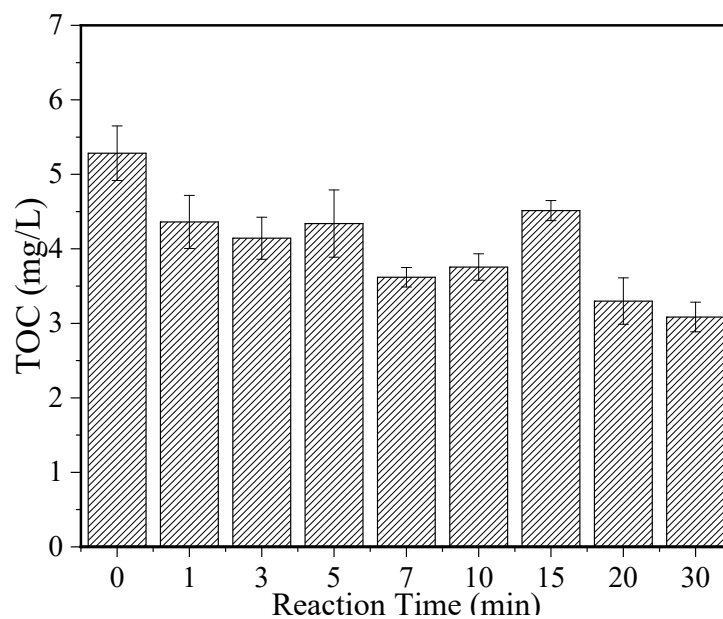

**Figure S6.** TOC changes in degradation of 4-AAA by thermal/PS system. Experimental conditions:  $[4\text{-AAA}]_0 = 40.77 \mu\text{M}$ ,  $[\text{PDS}]_0 = 1.63 \text{ mM}$ ,  $\text{pH}_0 = 7.00$ ,  $T = 80 \text{ }^\circ\text{C}$ .
